# Supplementary material for: Clinical Pharmacokinetics of a Lipid-Based Formulation of Risperidone, VAL401: Analysis of a Single Dose in an Open-Label Trial of Late-Stage Cancer Patients
Source: PubMed Central journal article supplement — Eur J Drug Metab Pharmacokinet. 2019 Jan 9;44(4):557–65. doi: 10.1007/s13318-018-00538-4 (PMC6616216; doi:10.1007/s13318-018-00538-4), 2019-01-09
Supplement: 13318_2018_538_MOESM1_ESM.pdf [file 13318_2018_538_MOESM1_ESM.pdf]

## Supplementary Material

Journal:

European Journal of Drug Metabolism and Pharmacokinetics

Title:

Clinical Pharmacokinetics of a lipid based formulation of Risperidone, VAL401; analysis of a single, first dose in an open label trial of late stage cancer patients

Running header:

Clinical Pharmacokinetics of VAL401, a lipid based formulation of Risperidone, in late stage cancer patients

Corresponding author:

Suzanne J. Dilly, ValiSeek Limited, 16 Upper Woburn Place, London, WC1H 0BS.

Suzanne.dilly@valirx.com +44 203 0084416

Orcid: 0000-0002-5861-6794

Authors:

George S. Morris, ValiSeek Limited, 16 Upper Woburn Place, London, WC1H 0BS, UK

Paul C. Taylor, School of Chemistry, University of Leeds, Leeds, LS2 9JT, UK

Frederic Parmentier, Ariana Pharmaceuticals, 43-47 Av de la Grande Armée, 75116, Paris, France

Coralie Williams, Ariana Pharmaceuticals, 43-47 Av de la Grande Armée, 75116, Paris, France

Mohammad Afshar, Ariana Pharmaceuticals, 43-47 Av de la Grande Armée, 75116, Paris, France

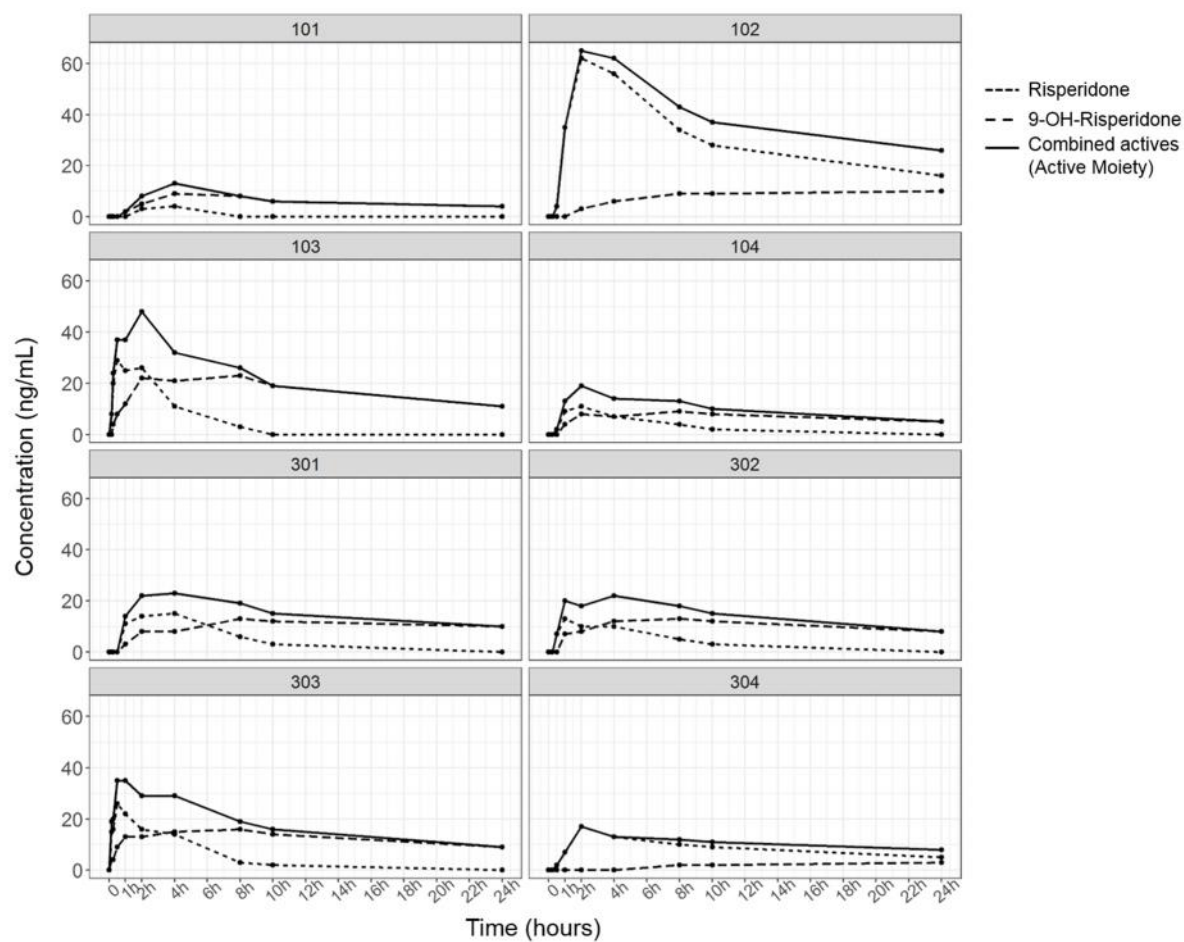

Supplementary Figure S1: Concentration levels (ng/mL) of risperidone, active metabolite 9-hydroxy-risperidone and the combined actives, “active moiety” (a sum of risperidone and 9-hydroxy-risperidone) for each patient in the VAL-401 trial.

| Time     | Risperidone (ng/mL) |      | 9-hydroxy-risperidone (ng/mL) |      | Total Active (ng/mL) |      |
|----------|---------------------|------|-------------------------------|------|----------------------|------|
|          | Mean                | SEM  | Mean                          | SEM  | Mean                 | SEM  |
| 0        | 0.00                | 0.00 | 0.00                          | 0.00 | 0.00                 | 0.00 |
| 10 min   | 2.88                | 1.99 | 0.50                          | 0.50 | 3.38                 | 2.44 |
| 15 min   | 4.50                | 2.97 | 1.00                          | 0.65 | 5.50                 | 3.62 |
| 30 min   | 8.75                | 4.18 | 2.13                          | 1.39 | 10.88                | 5.54 |
| 1 hour   | 15.25               | 3.99 | 5.13                          | 1.80 | 20.38                | 4.85 |
| 2 hours  | 19.88               | 6.45 | 8.38                          | 2.38 | 28.25                | 6.69 |
| 4 hours  | 16.25               | 5.82 | 9.75                          | 2.23 | 26.00                | 5.74 |
| 8 hours  | 8.13                | 3.83 | 11.63                         | 2.20 | 19.75                | 3.84 |
| 10 hours | 5.88                | 3.31 | 10.25                         | 1.84 | 16.13                | 3.31 |
| 24 hours | 2.63                | 2.01 | 7.50                          | 1.09 | 10.13                | 2.42 |

Supplementary Table S1: Mean and SEM (standard error of the mean) values stated across the time course for risperidone, active metabolite 9-hydroxy-risperidone and the combined actives (a sum of risperidone and 9-hydroxy-risperidone).

| VAL-401 patients                                              |                       |                         |
|---------------------------------------------------------------|-----------------------|-------------------------|
| Active Moiety (risperidone + 9-OH-risperidone):<br>"ParamSum" |                       |                         |
| Parameter                                                     | unit                  | Lung cancer<br>(median) |
| T <sub>max</sub>                                              | hour                  | 3                       |
| C <sub>max</sub>                                              | ng/ml                 | 11.3*                   |
| C <sub>last</sub>                                             | ng/ml                 | 7.3*                    |
| t <sub>1/2</sub>                                              | hour                  | 25.4                    |
| V <sub>dss</sub>                                              | mL                    | 268.5                   |
| AUC (0-∞)                                                     | ng.h/mL               | 302.5*                  |
| AUC (0-last)                                                  | ng.h/mL               | 163*                    |
| AUMC (0-∞)                                                    | ng.h <sup>2</sup> /mL | 19021.4*                |
| Cl oral                                                       | mL/min                | 352.8                   |
| MRT                                                           | hour                  | 13                      |

Supplementary Table S2: Summary of median values of pharmacokinetics parameter for the combination as the active moiety using the "ParamSum" approach in VAL-401 study. VAL-401 parameter values normalised by dose were reported for C<sub>max</sub>, AUC<sub>0-∞</sub>, AUC<sub>0-last</sub> and AUMC<sub>0-∞</sub>, characterised with an asterisk \*, adjusting values to a dosage of 1mg of risperidone.

\* normalised by dose
